# Supplementary material for: Shared etiology of type 1 diabetes and Hashimoto’s thyroiditis: a population-based twin study
Source: PubMed Central journal article supplement (PMC9175555; doi:10.1530/eje-22-0025), 2022-04-07

## Supplementary material

**Supplementary Table 1.** Diagnostic criteria

| <b>Hashimotos thyroiditis</b> |                                                                                                                                                                                                                  |                                                             |                                                                              |                                      |
|-------------------------------|------------------------------------------------------------------------------------------------------------------------------------------------------------------------------------------------------------------|-------------------------------------------------------------|------------------------------------------------------------------------------|--------------------------------------|
|                               | ICD10                                                                                                                                                                                                            | ICD9                                                        | ICD8                                                                         | ICD7                                 |
| Inclusion criteria            | E035<br>E039<br>E063<br>E065                                                                                                                                                                                     | 244X<br>245C<br>245W                                        | 244,0<br>245,03                                                              | 253,00<br>253,19<br>253,29<br>254,00 |
|                               | Or:<br>A diagnosis of Addison's disease or type-1 diabetes and at least two filled prescriptions for levothyroxine (ATC-H03AA)                                                                                   |                                                             |                                                                              |                                      |
| Exclusion criteria            | E030<br>E031<br>E032<br>E033<br>E050<br>E055<br>E064<br>E890<br>E00<br>E01<br>E02<br>E060<br>E061                                                                                                                | 242A<br>243<br>244A<br>244B<br>244C<br>244D<br>244W<br>246B | 242,00<br>242,09<br>243,99<br>245,00<br>245,01<br>245,02<br>245,04<br>244,00 | 057,11<br>252,00<br>252,01<br>252,02 |
|                               | Or:<br>procedural codes<br>BAA60, BAA40, BAA50, BAA20<br>810, 811, 814, 820, 812, 813, 822, 824, 830<br><br>Or:<br>If alive 1 jan 2006; failure to fill at least two prescription for levothyroxine (ATC- H03AA) |                                                             |                                                                              |                                      |
| <b>Type 1 diabetes</b>        |                                                                                                                                                                                                                  |                                                             |                                                                              |                                      |
| Inclusion criteria            | Included in the National Diabetes Register with a diagnosis of type-1 diabetes at age 30 years or younger, and treated with insulin only.                                                                        |                                                             |                                                                              |                                      |
| Exclusion criteria            | None                                                                                                                                                                                                             |                                                             |                                                                              |                                      |

**Supplementary Table 2.** Association and familial co-aggregation between type 1 diabetes and Hashimoto's thyroiditis.

|                                      | Crude risk ratio | Adjusted <sup>a</sup> risk ratio |
|--------------------------------------|------------------|----------------------------------|
| <b>Between disorders<sup>b</sup></b> |                  |                                  |
| Within individual association        | 9.9 (7.2-13.6)   | 13.6 (9.6-19.3)                  |
| Co-aggregation monozygotic           | 6.7 (3.1-14.8)   | 8.0 (3.4-18.9)                   |
| Co-aggregation dizygotic             | 1.3 (0.6-3.2)    | 1.8 (0.7-4.3)                    |

<sup>a</sup> Adjusted for sex and birth cohort

<sup>b</sup> Hashimoto's thyroiditis was considered exposure and Type 1 diabetes outcome.

**Supplementary Table 3.** Quantitative genetic results, crude models.

|                             |                        | ACE                | ADE               | AE                      | CE               |
|-----------------------------|------------------------|--------------------|-------------------|-------------------------|------------------|
| AIC                         |                        | -443,224.70        | -443,223.09       | <b>-443,228.84</b>      | -443,142.79      |
| BIC                         |                        | -2,420,611.63      | -2,420,610.02     | <b>-2,420,642.54</b>    | -2,420,556.49    |
| <i>Univariate estimates</i> |                        |                    |                   |                         |                  |
| T1D                         |                        |                    |                   |                         |                  |
|                             | A                      | 81% (50-100)       | 69% (12-100)      | <b>83% (76-89)</b>      | NA               |
|                             | D                      | NA                 | 15% (0-73)        | <b>NA</b>               | NA               |
|                             | H                      | 81% (50-100)       | 83% (77-90)       | <b>83% (76-89)</b>      | NA               |
|                             | C                      | 2% (0-31)          | NA                | <b>NA</b>               | 74% (68-80)      |
|                             | E                      | 17% (10-24)        | 17% (10-23)       | <b>17% (11-24)</b>      | 26% (20-32)      |
| HT                          |                        |                    |                   |                         |                  |
|                             | A                      | 60% (45-76)        | 70% (45-95)       | <b>71% (66-75)</b>      | NA               |
|                             | D                      | NA                 | 0 (0-27)          | <b>NA</b>               | NA               |
|                             | H                      | 60% (45-76)        | 71% (65-76)       | <b>71% (66-75)</b>      | NA               |
|                             | C                      | 9% (0-22)          | NA                | <b>NA</b>               | 57% (53-61)      |
|                             | E                      | 31% (26-36)        | 29% (24-35)       | <b>29% (25-34)</b>      | 43% (39-47)      |
| <i>Bivariate estimates</i>  |                        |                    |                   |                         |                  |
|                             | Phenotypic correlation | 0.37 (0.31-0.43)   | 0.34 (-0.18-0.87) | <b>0.37 (0.31-0.43)</b> | 0.34 (0.29-0.40) |
|                             | $r_A$                  | 0.35 (-0.11-0.82)  | 0.26 (-0.45-0.97) | <b>0.26 (0.13-0.40)</b> | NA               |
|                             | $r_D$                  | NA                 | 1.00 (-1.00-1.00) | <b>NA</b>               | NA               |
|                             | $r_H$                  | 0.35 (-0.11-0.82)  | 0.27 (0.12-0.41)  | <b>0.26 (0.13-0.40)</b> | NA               |
|                             | $r_C$                  | -1.00 (-1.00-1.00) | NA                | <b>NA</b>               | 0.14 (0.02-0.27) |
|                             | $r_E$                  | 0.71 (0.34-1.00)   | 0.73 (0.35-1.00)  | <b>0.73 (0.38-1.00)</b> | 0.75 (0.54-0.96) |
|                             | Bivariate A            | 67% (-20-154)      | 53% (-15-120)     | <b>55% (31-80)</b>      | NA               |
|                             | Bivariate D            | NA                 | 7% (-160-175)     | <b>NA</b>               | NA               |
|                             | Bivariate H            | 67% (-20-154)      | 60% (-49-169)     | <b>55% (31-80)</b>      | NA               |
|                             | Bivariate C            | -12% (-84-61)      | NA                | <b>NA</b>               | 27% (4-49)       |
|                             | Bivariate E            | 45% (18-72)        | 47% (-20-115)     | <b>45% (20-69)</b>      | 73% (51-96)      |

AIC, Akaike's information criterion; BIC, Bayesian information criterion; T1D, type 1 diabetes; HT, Hashimoto's thyroiditis; A, additive genetics/narrow sense heritability; D, dominance deviations; H, broad sense heritability (A+D); C, shared environment; E, individually unique environment; ACE, ADE, AE, CE, models containing named sources of (co)variance; NA, not applicable; Bivariate A, explained phenotypic correlation by A sources of (co)variance (similar for, H, C, and E).

Confidence intervals are of Wald-type, thus they may span outside the parameter space, when this happened the interval has been truncated at the parameter bound. **Bold** font indicates best fitting model according to AIC and BIC.

**Supplementary table 4.** Quantitative genetic results, adjusted<sup>a</sup> models

|                             | ACE                | ADE               | AE                      | CE               |
|-----------------------------|--------------------|-------------------|-------------------------|------------------|
| AIC                         | -443,178.04        | -443,177.70       | <b>-443,183.30</b>      | -443,097.79      |
| BIC                         | -2,420,493.59      | -2,420,493.25     | <b>-2,420,525.62</b>    | -2,420,440.11    |
| <i>Univariate estimates</i> |                    |                   |                         |                  |
| T1D                         |                    |                   |                         |                  |
| A                           | 80% (50-100)       | 65% (9-100)       | <b>82% (75-88)</b>      | NA               |
| D                           | NA                 | 18% (0-74)        | <b>NA</b>               | NA               |
| H                           | 80% (50-100)       | 82% (76-89)       | <b>82% (75-88)</b>      | NA               |
| C                           | 1% (0-30)          | NA                | <b>NA</b>               | 72% (66-78)      |
| E                           | 18% (11-25)        | 18% (11-24)       | <b>18% (12-25)</b>      | 28% (22-34)      |
| HT                          |                    |                   |                         |                  |
| A                           | 0.60 (0.44-0.76)   | 0.66 (0.40-0.91)  | <b>67% (62-71)</b>      | NA               |
| D                           | NA                 | 0.01 (0.00-0.28)  | <b>NA</b>               | NA               |
| H                           | 0.60 (0.44-0.76)   | 0.67 (0.61-0.72)  | <b>67% (62-71)</b>      | NA               |
| C                           | 0.06 (0.00-0.19)   | NA                | <b>NA</b>               | 53% (49-57)      |
| E                           | 0.34 (0.29-0.39)   | 0.33 (0.28-0.39)  | <b>33% (29-38)</b>      | 47% (43-51)      |
| <i>Bivariate estimates</i>  |                    |                   |                         |                  |
| Phenotypic correlation      | 0.45 (0.39-0.50)   | 0.45 (0.39-0.51)  | <b>0.45 (0.39-0.50)</b> | 0.42 (0.37-0.47) |
| $r_A$                       | 0.42 (-0.02-0.87)  | 0.35 (-0.39-1.00) | <b>0.36 (0.23-0.48)</b> | NA               |
| $r_D$                       | NA                 | 1.00 (-1.00-1.00) | <b>NA</b>               | NA               |
| $r_H$                       | 0.42 (-0.02-0.87)  | 0.36 (0.23-0.50)  | <b>0.36 (0.23-0.48)</b> | NA               |
| $r_C$                       | -1.00 (-1.00-1.00) | NA                | <b>NA</b>               | 0.24 (0.11-0.36) |
| $r_E$                       | 0.73 (0.43-1.00)   | 0.74 (0.43-1.00)  | <b>0.74 (0.45-1.00)</b> | 0.75 (0.57-0.93) |
| Bivariate A                 | 0.66 (-0.02-1.33)  | 0.51 (-0.58-1.59) | <b>0.59 (0.41-0.77)</b> | NA               |
| Bivariate D                 | NA                 | 0.10 (-1.05-1.24) | <b>NA</b>               | NA               |
| Bivariate H                 | 0.66 (-0.02-1.33)  | 0.60 (0.41-0.80)  | <b>0.59 (0.41-0.77)</b> | NA               |
| Bivariate C                 | -0.06 (-0.64-0.51) | NA                | <b>NA</b>               | 0.35 (0.18-0.52) |
| Bivariate E                 | 0.41 (0.21-0.60)   | 0.40 (0.20-0.59)  | <b>0.41 (0.23-0.59)</b> | 0.65 (0.48-0.82) |

AIC, Akaike's information criterion; BIC, Bayesian information criterion; T1D, type 1 diabetes; HT, Hashimoto's thyroiditis; A, additive genetics/narrow sense heritability; D, dominance deviations; H, broad sense heritability (A+D); C, shared environment; E, individually unique environment; ACE, ADE, AE, CE, models containing named sources of (co)variance; NA, not applicable; Bivariate A, explained phenotypic correlation by A sources of (co)variance (similar for D, H, C, and E).

Confidence intervals are of Wald-type, thus they may span outside the parameter space, but have been truncated at the parameter bound. **Bold** font indicates best fitting model according to AIC and BIC.

<sup>a</sup> Adjusted for sex and birth cohort.

**Supplementary Table 5.** Concordances and discordances for APS-3, i.e. type 1 diabetes and Hashimoto's thyroiditis combined.

|                   | Concordant non-affected | Discordant | Concordant affected | Concordance rate | Tetrachoric correlation <sup>a</sup> |
|-------------------|-------------------------|------------|---------------------|------------------|--------------------------------------|
| APS-3 monozygotic | 17,977                  | 14         | 4                   | 0.36 (0.17-0.74) | 0.88 (0.76-1.00)                     |
| APS-3 dizygotic   | 37,386                  | 26         | 0                   | 0.000 (NA)       | -0.62 (-1.00-1.00)                   |

APS-3, having both type 1 diabetes and Hashimoto's thyroiditis.

<sup>a</sup> Unadjusted.

**Supplementary Table 6.** Results for APS-3, i.e., type 1 diabetes and Hashimoto's combined, crude model.

|     | ACE           | ADE           | AE                   | CE            |
|-----|---------------|---------------|----------------------|---------------|
| AIC | -220,829.15   | -220,829.57   | <b>-220,831.15</b>   | -220,825.61   |
| BIC | -1,209,536.00 | -1,209,536.42 | <b>-1,209,546.92</b> | -1,209,541.38 |
| A   | 85% (71-98)   | 0% (0-0)      | <b>85% (71-98)</b>   | NA            |
| D   | NA            | 85% (72-99)   | <b>NA</b>            | NA            |
| H   | 85% (71-98)   | 85% (72-99)   | <b>85% (71-98)</b>   | NA            |
| C   | 0% (0-0)      | NA            | <b>NA</b>            | 74% (59-89)   |
| E   | 15% (2-29)    | 15% (1-28)    | <b>15% (2-29)</b>    | 26% (11-41)   |

AIC, Akaike's information criterion; BIC, Bayesian information criterion; A, additive genetics/narrow sense heritability; D, dominance deviations; H, broad sense heritability (A+D); C, shared environment; E, individually unique environment; ACE, ADE, AE, CE, models containing named sources of (co)variance; NA, not applicable.

Confidence intervals are of Wald-type, thus they may span outside the parameter space, when this happened the interval has been truncated at the parameter bound. **Bold font** indicates best fitting model according to AIC.

**Supplementary Figure 1** Year of, and age at diagnosis.

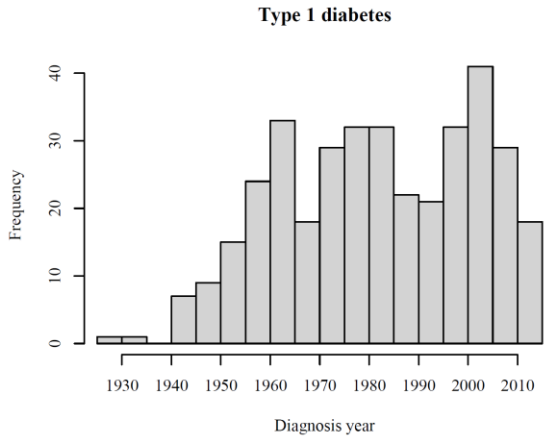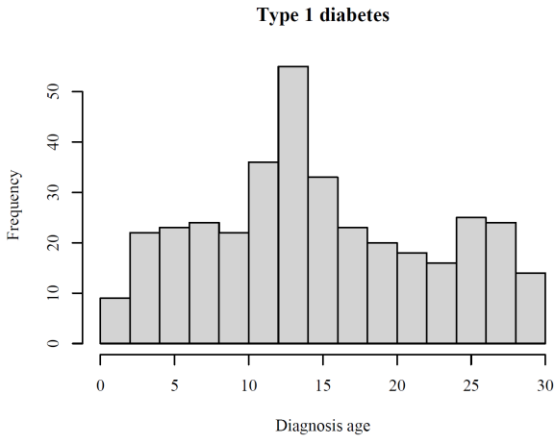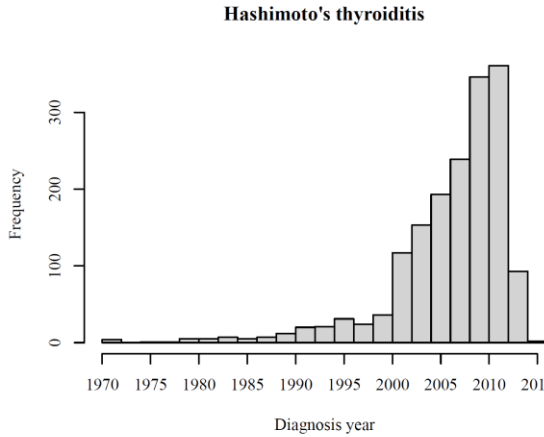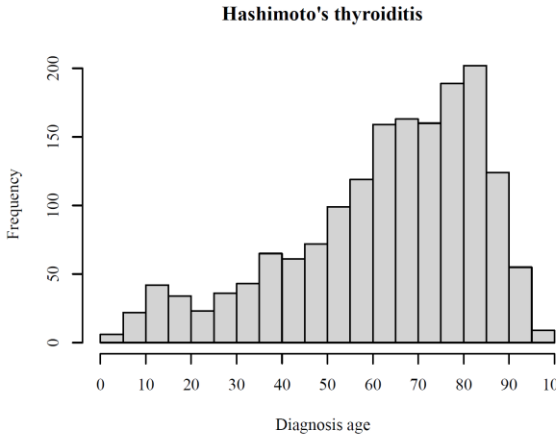

Supplement: supplementary_material.pdf [file supplementary_material.pdf]
